# Supplementary figures and images for: Spatial multi-omics revealed the impact of tumor ecosystem heterogeneity on immunotherapy efficacy in patients with advanced non-small cell lung cancer treated with bispecific antibody
Source: PubMed Central journal article supplement — J Immunother Cancer. 2023 Feb 28;11(2):e006234. doi: 10.1136/jitc-2022-006234 (PMC9980352; doi:10.1136/jitc-2022-006234), 2023-02-28

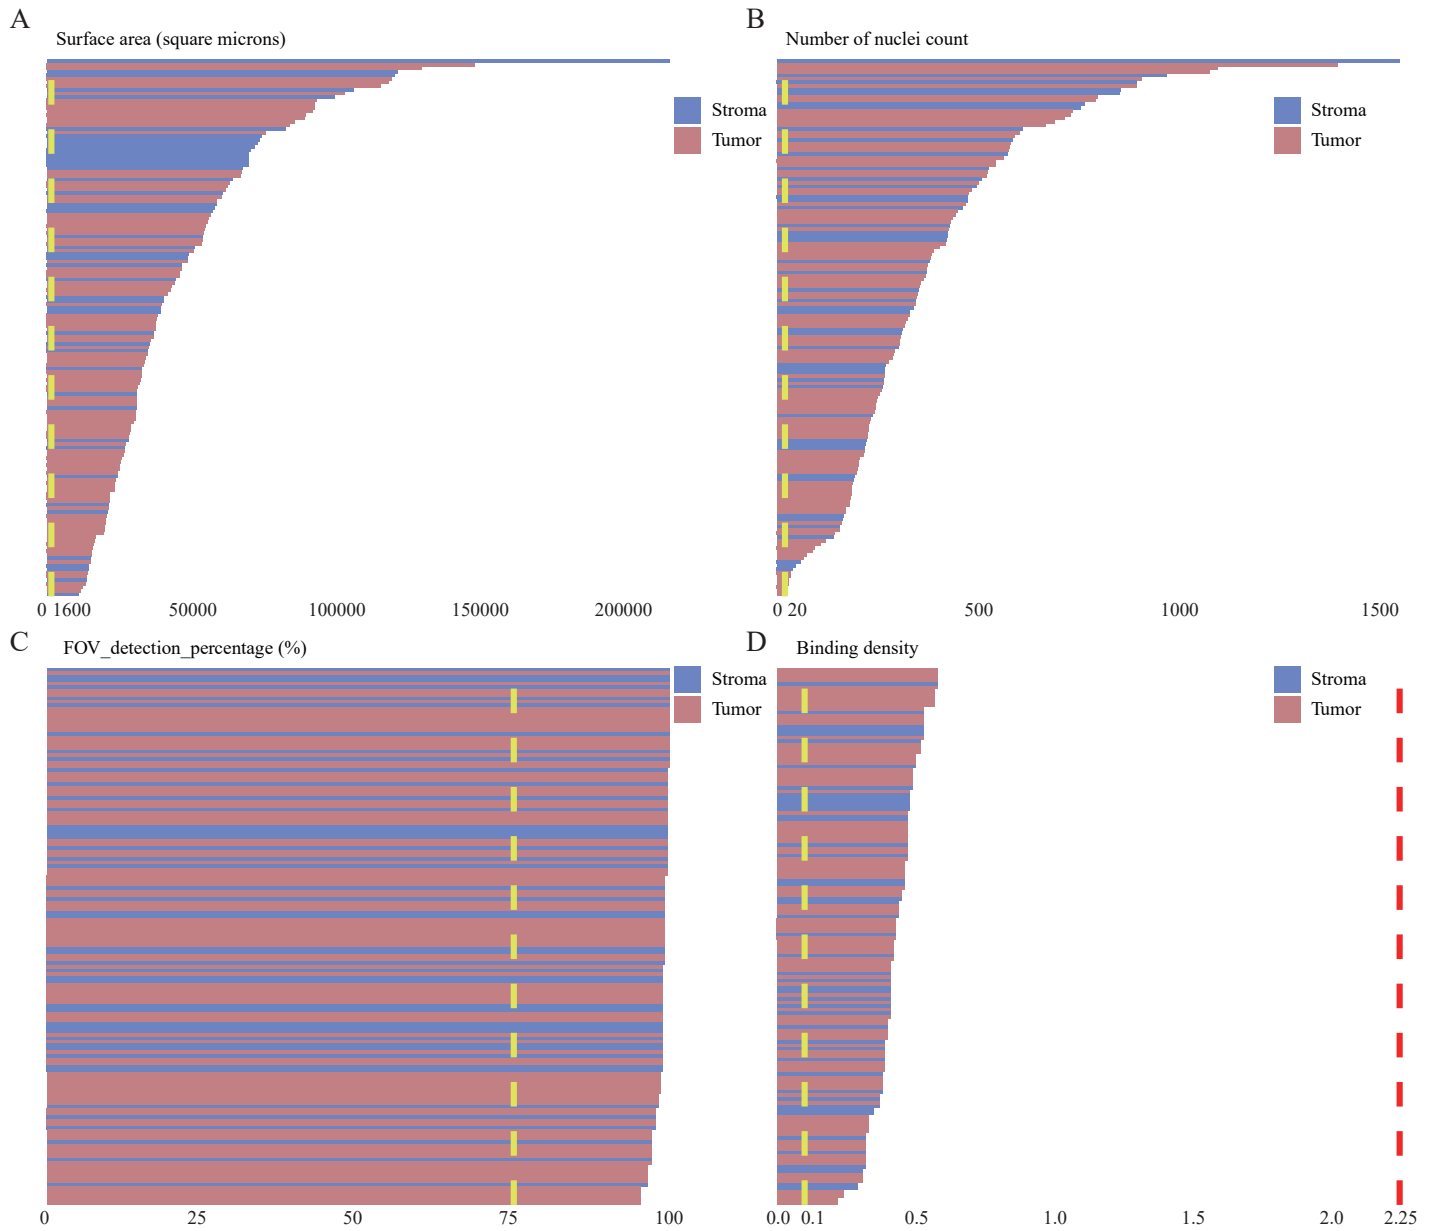

Supplement: jitc-2022-006234supp004.pdf [file jitc-2022-006234supp004.pdf]

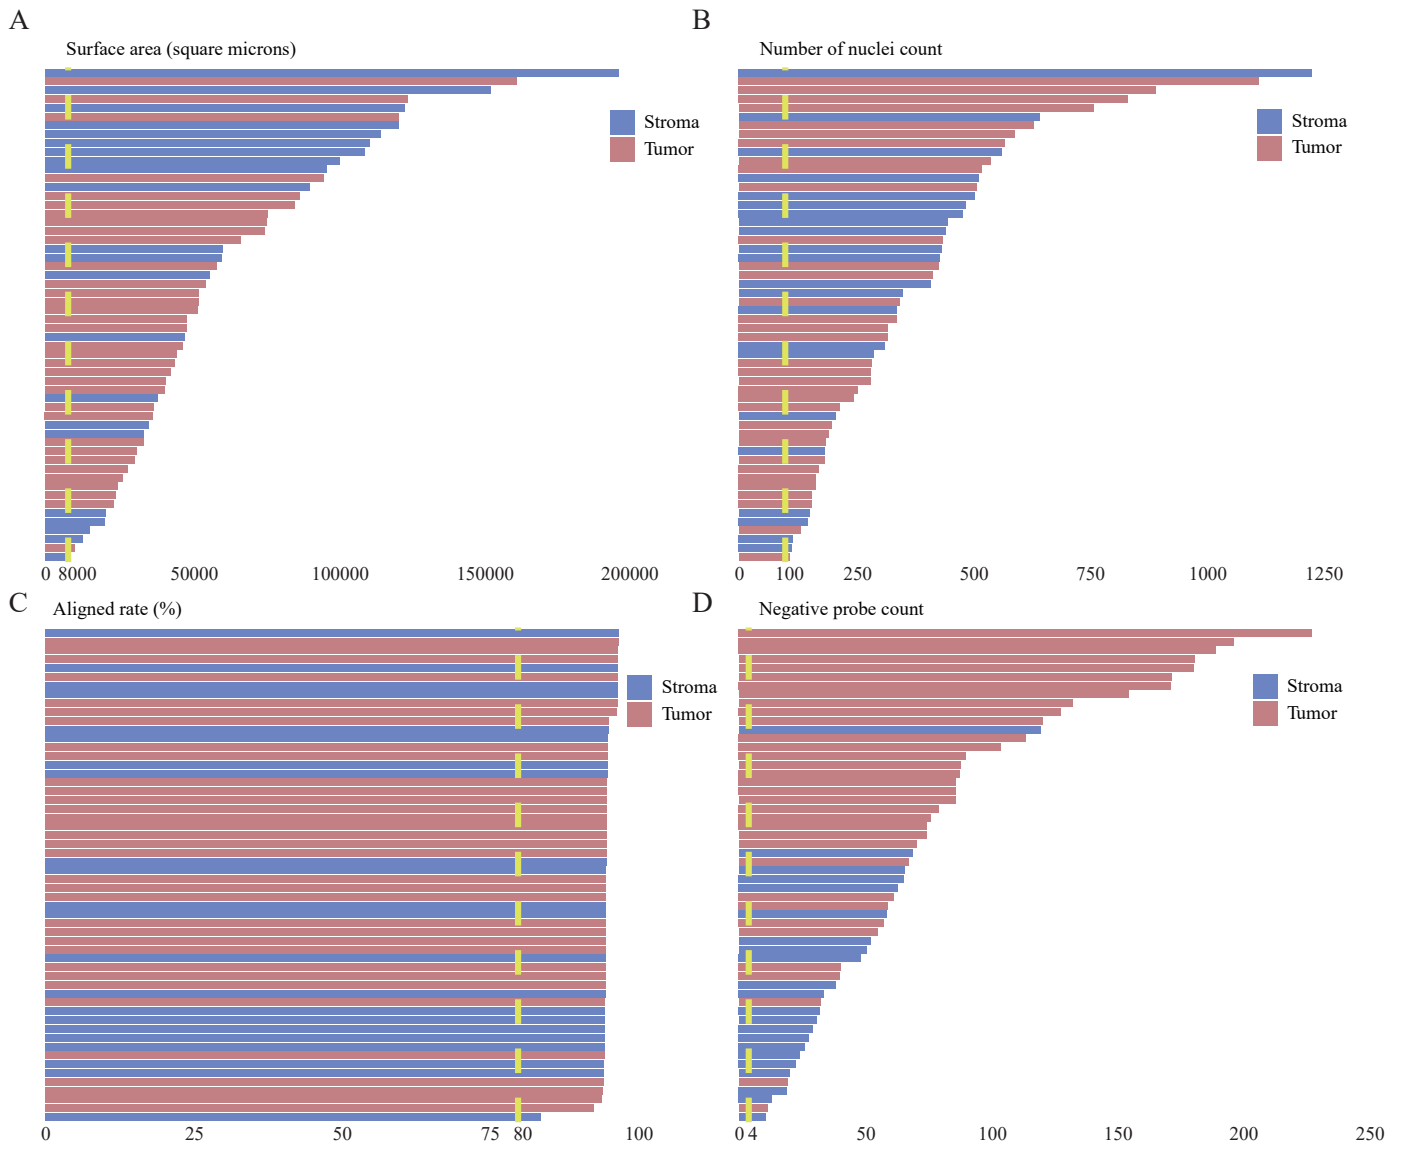

Supplement: jitc-2022-006234supp005.pdf [file jitc-2022-006234supp005.pdf]

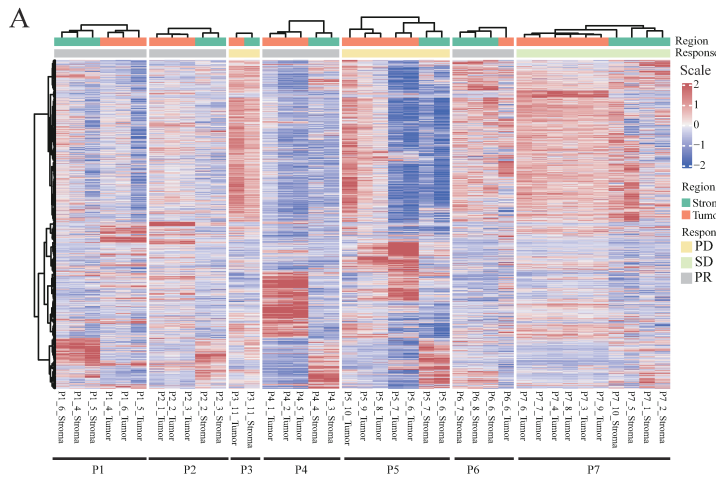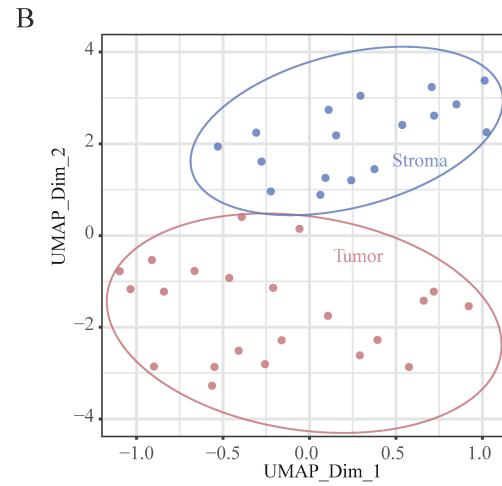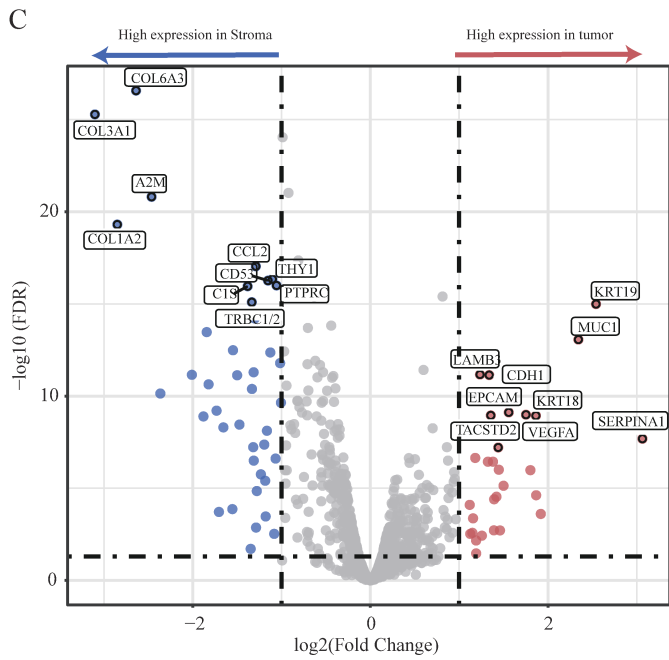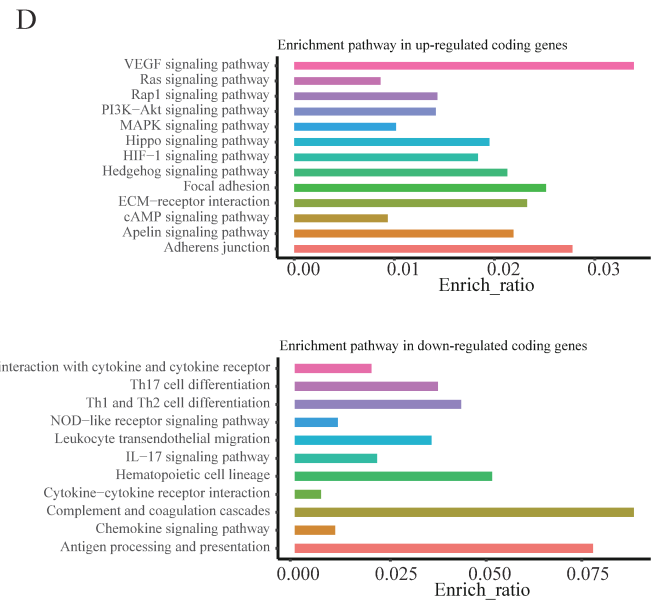

Supplement: jitc-2022-006234supp006.pdf [file jitc-2022-006234supp006.pdf]

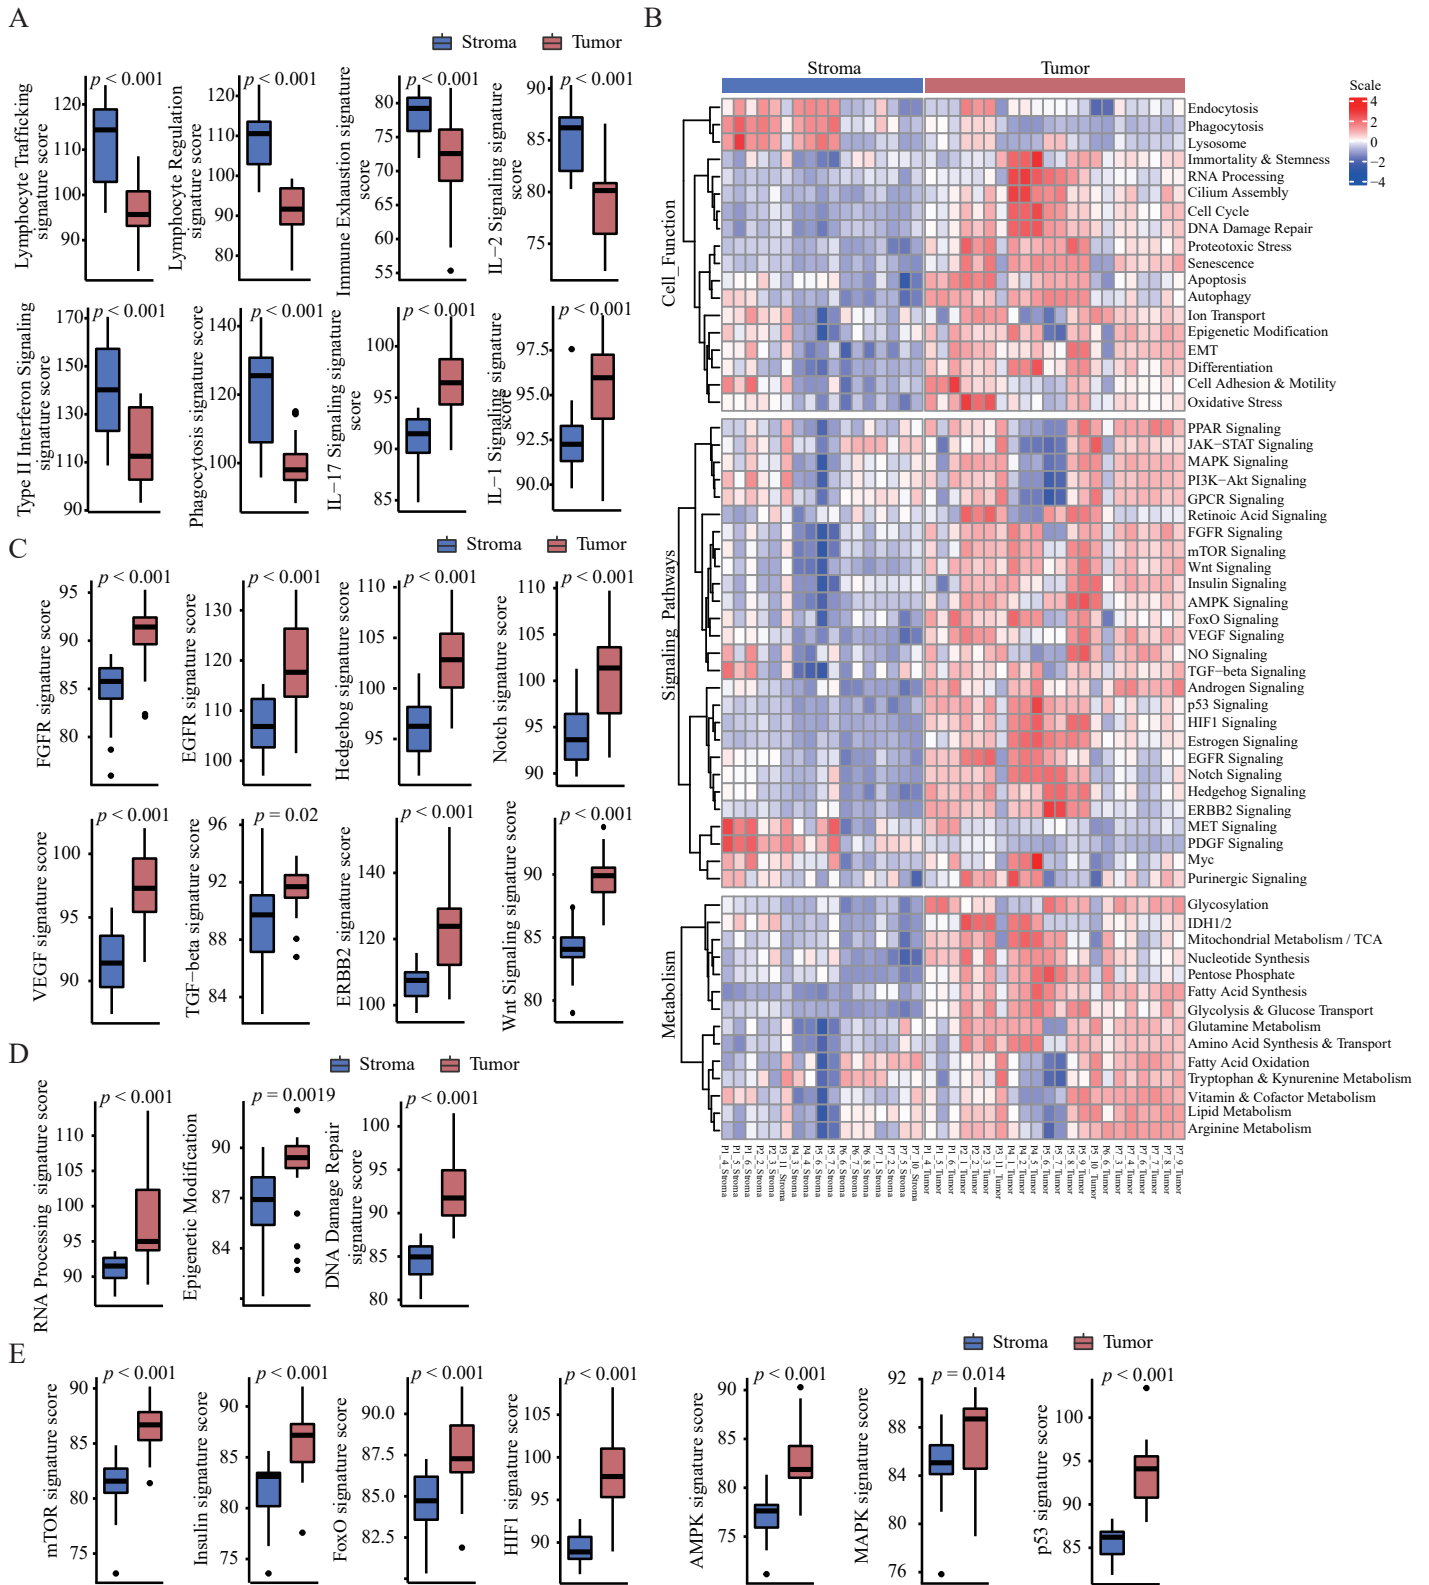

Supplement: jitc-2022-006234supp013.pdf [file jitc-2022-006234supp013.pdf]

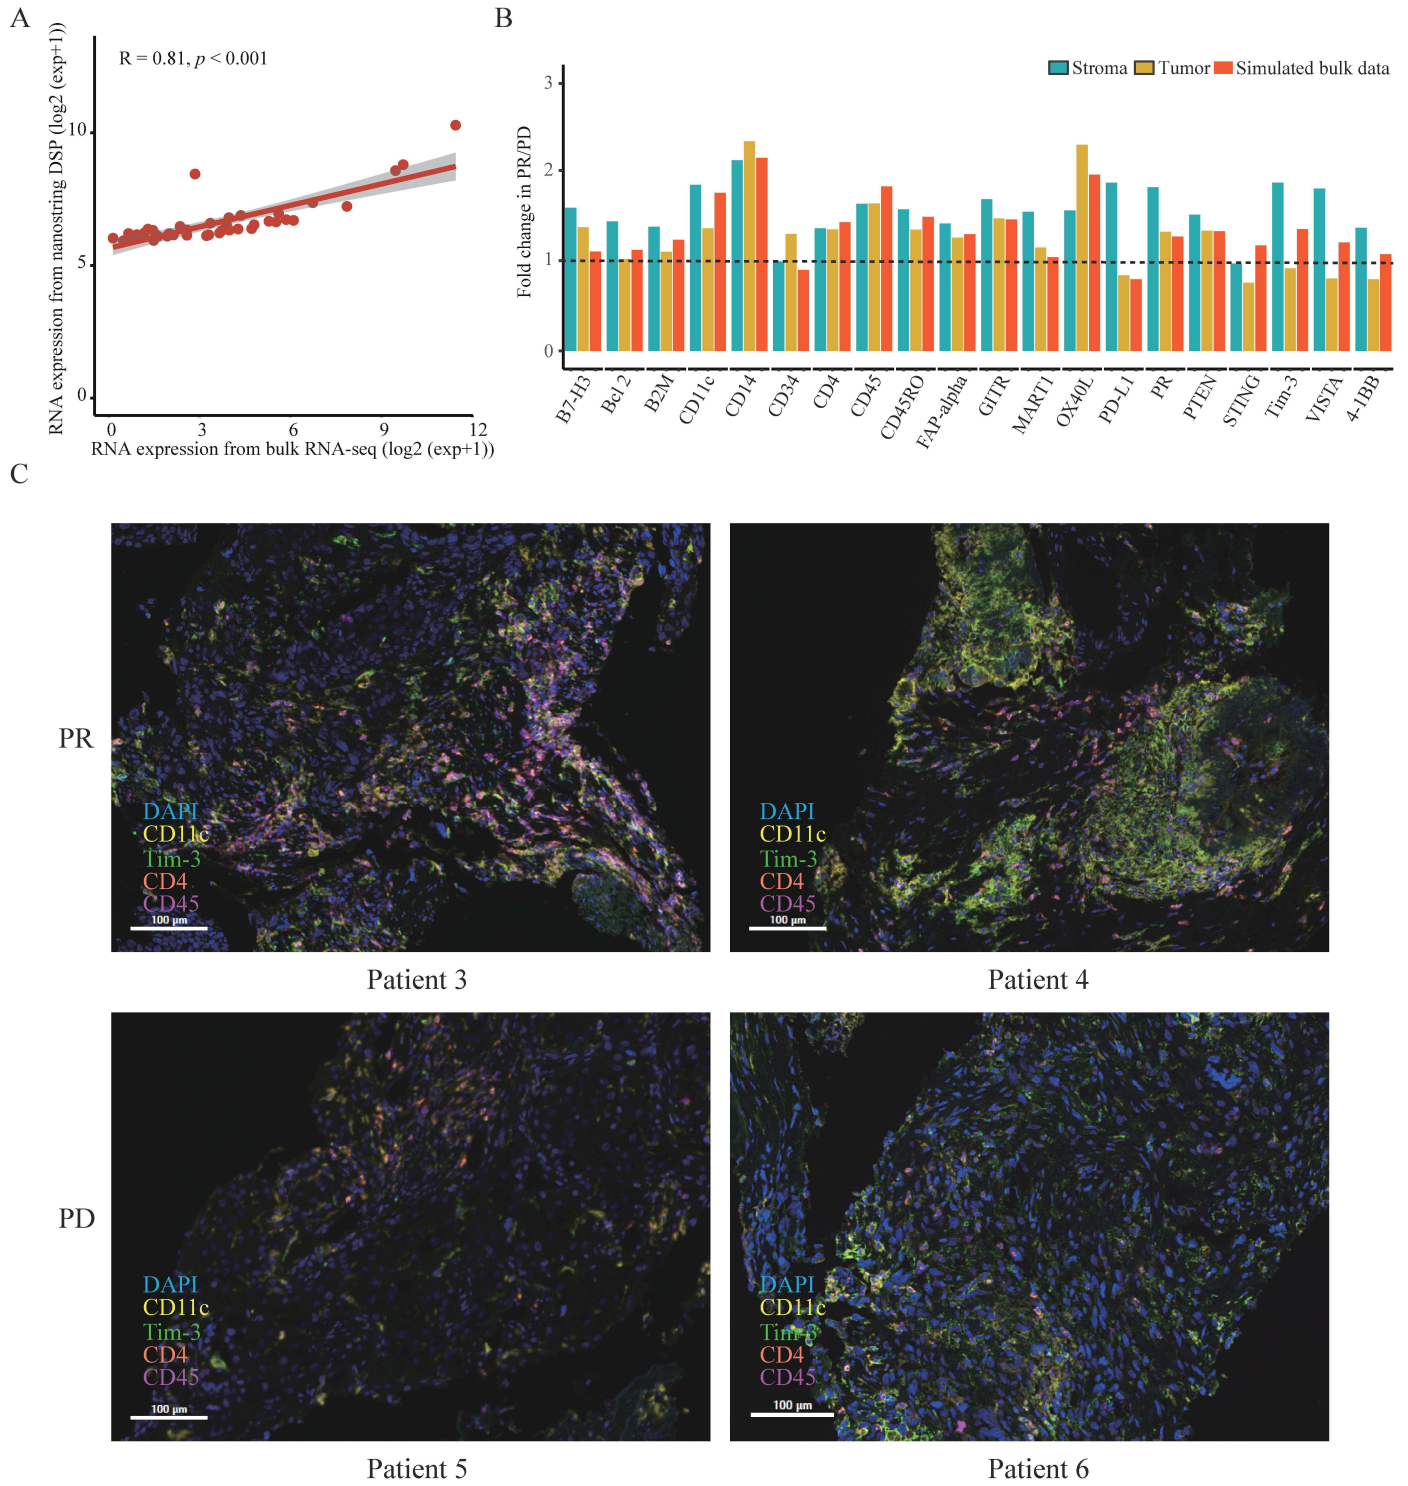

Supplement: jitc-2022-006234supp014.pdf [file jitc-2022-006234supp014.pdf]

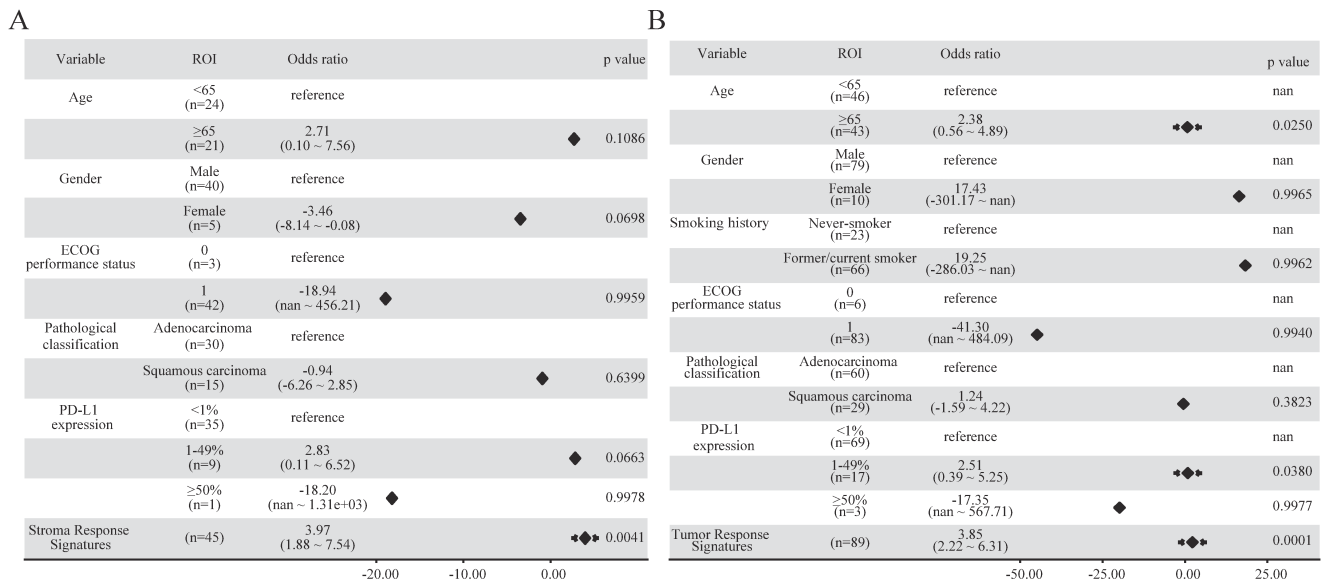

Supplement: jitc-2022-006234supp021.pdf [file jitc-2022-006234supp021.pdf]
