# Supplementary figures and images for: Spatial multi-omics revealed the impact of tumor ecosystem heterogeneity on immunotherapy efficacy in patients with advanced non-small cell lung cancer treated with bispecific antibody
Source: HighWire-hosted journal article supplement (doi:10.1136/jitc-2022-006234), 2023-02-01

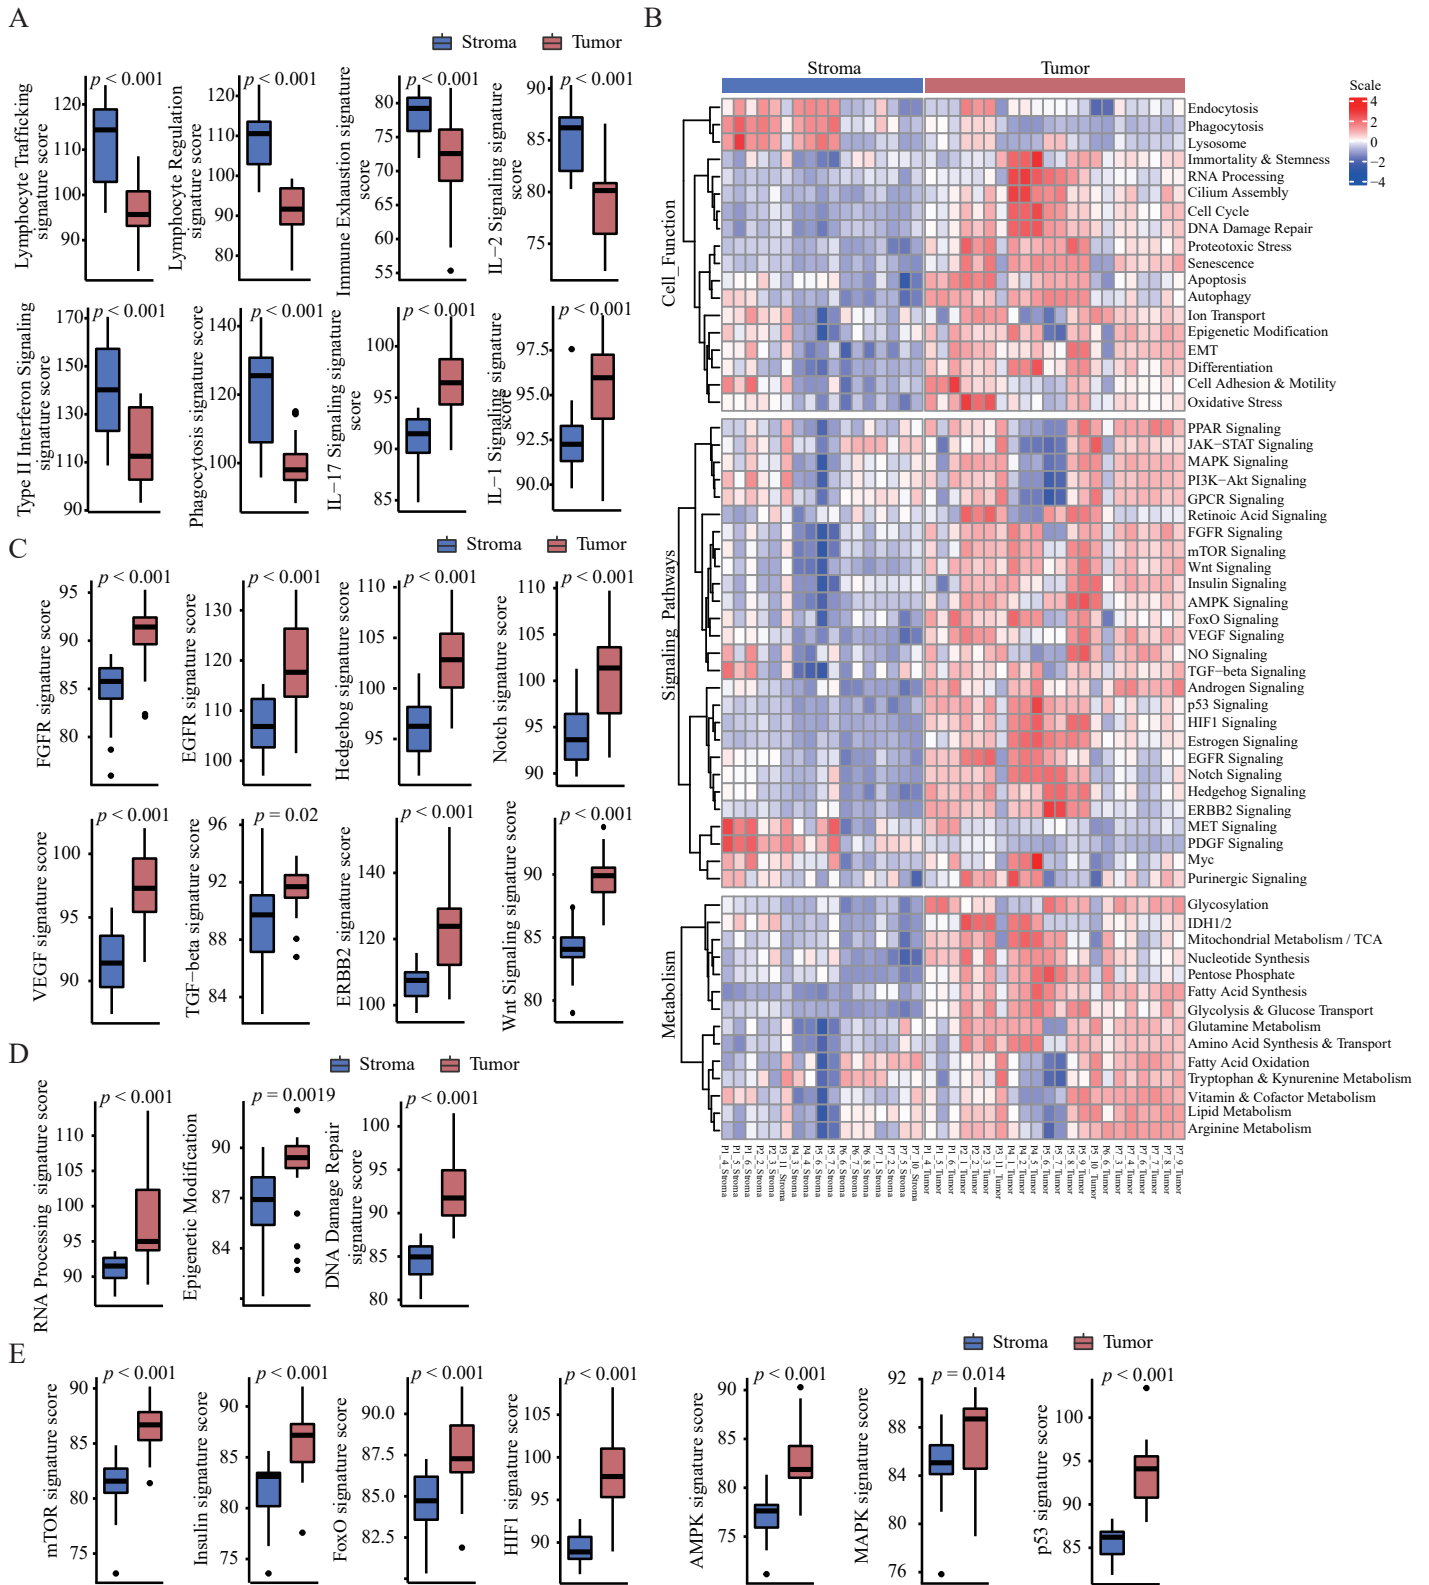

Supplement: jitc-2022-006234supp013_data_supplement.pdf [file jitc-2022-006234supp013_data_supplement.pdf]

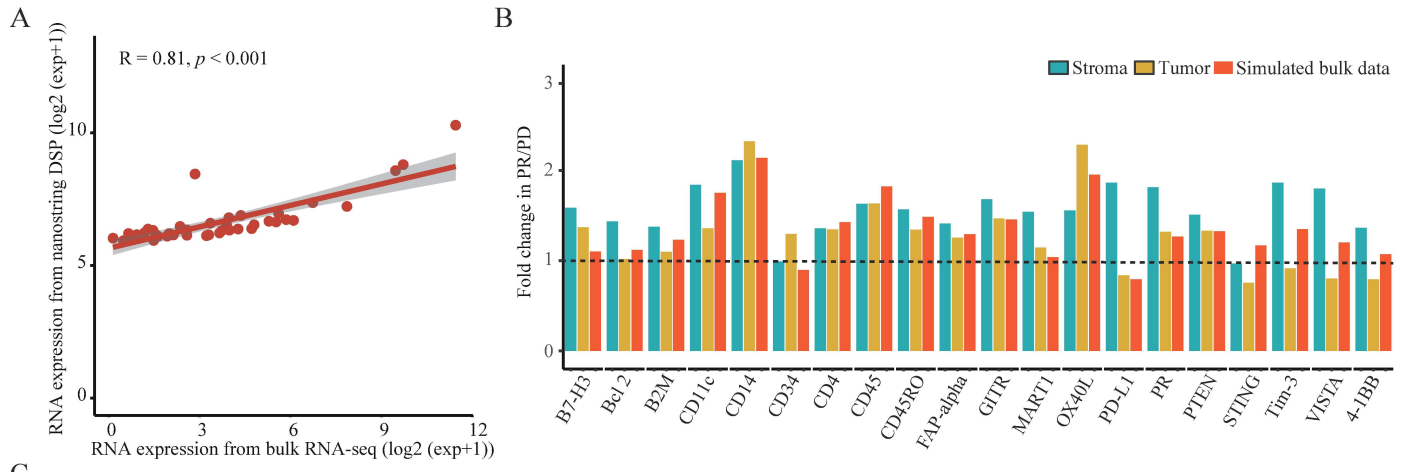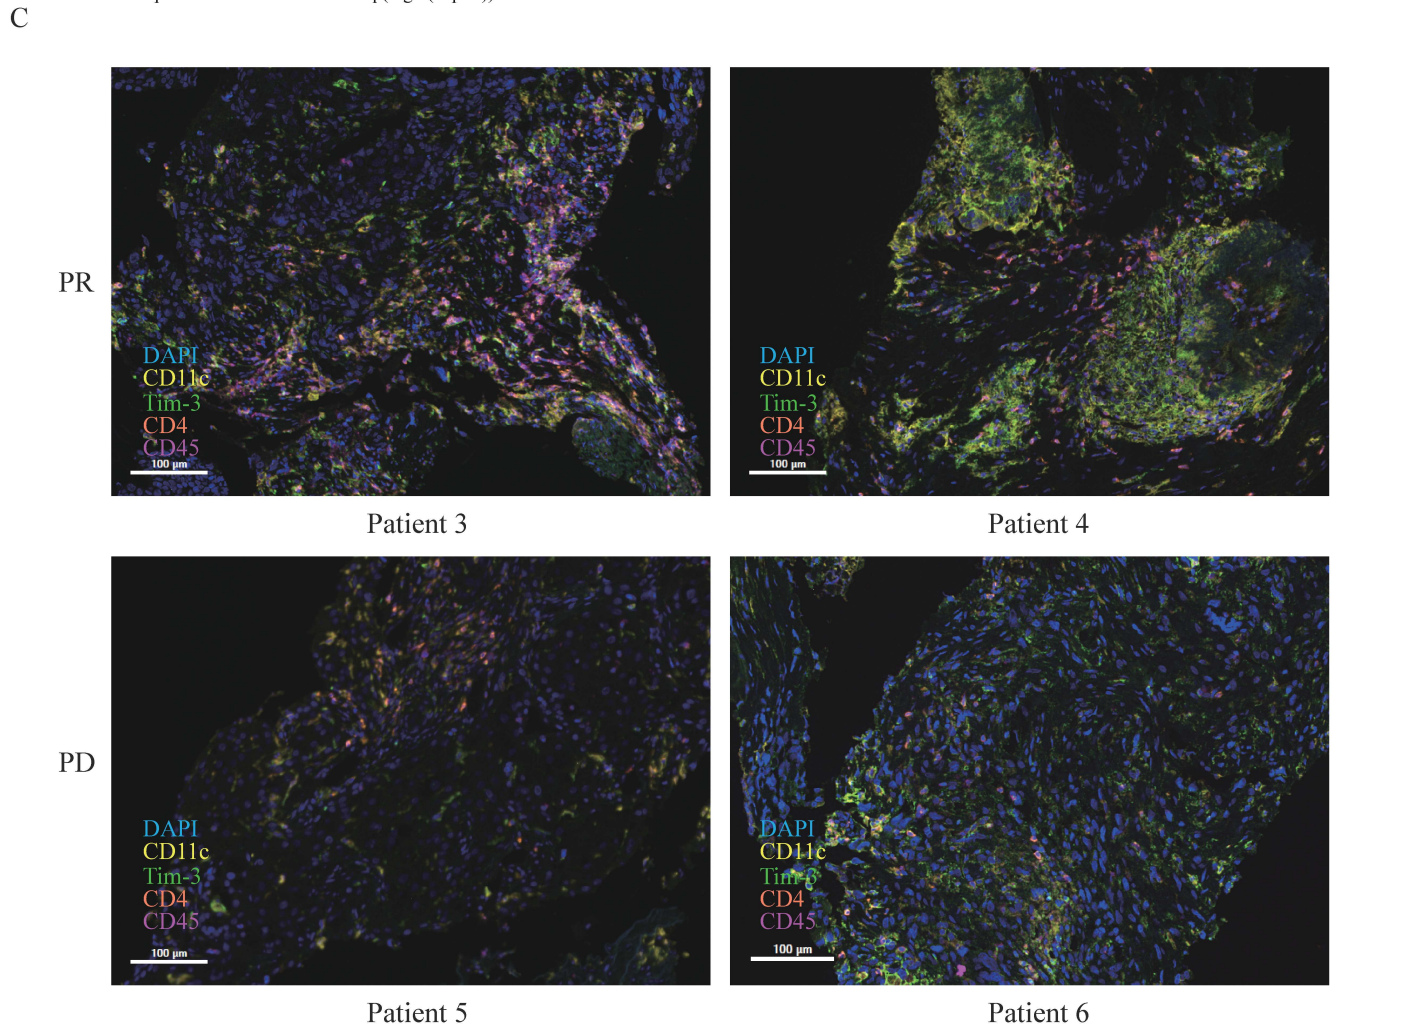

Supplement: jitc-2022-006234supp014_data_supplement.pdf [file jitc-2022-006234supp014_data_supplement.pdf]

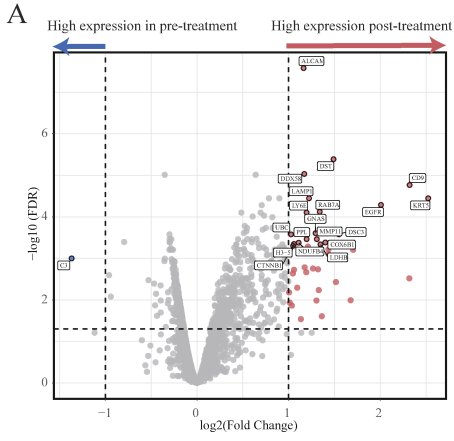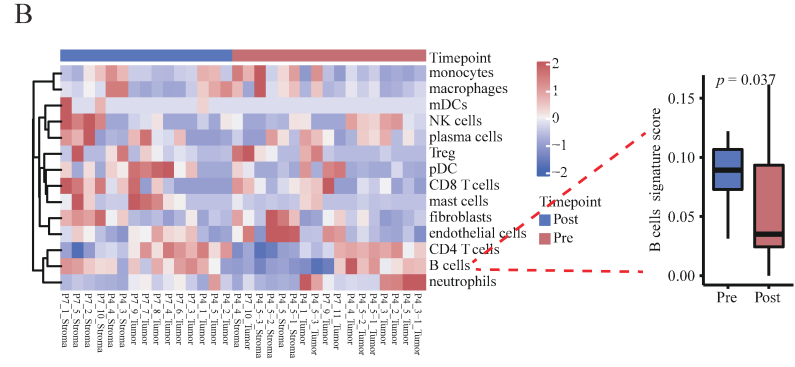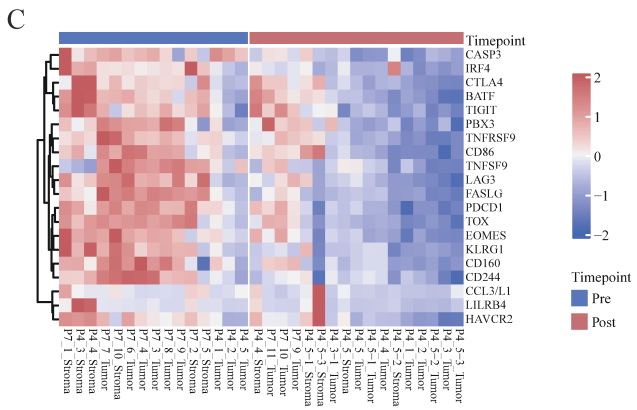

Supplement: jitc-2022-006234supp017_data_supplement.pdf [file jitc-2022-006234supp017_data_supplement.pdf]

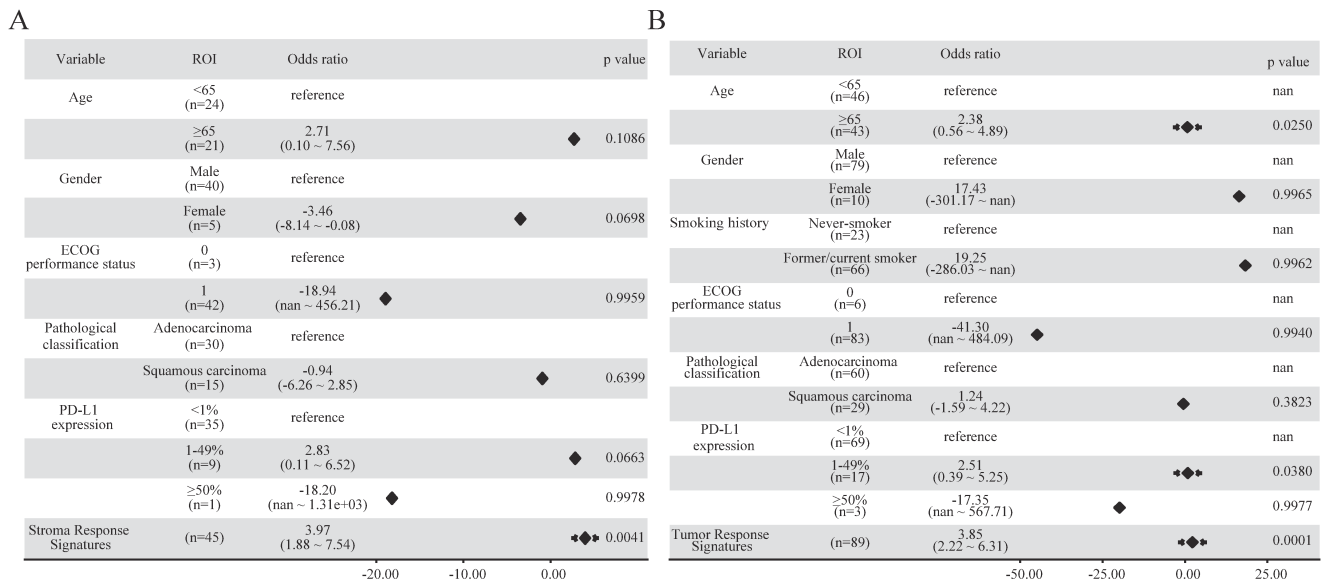

Supplement: jitc-2022-006234supp021_data_supplement.pdf [file jitc-2022-006234supp021_data_supplement.pdf]

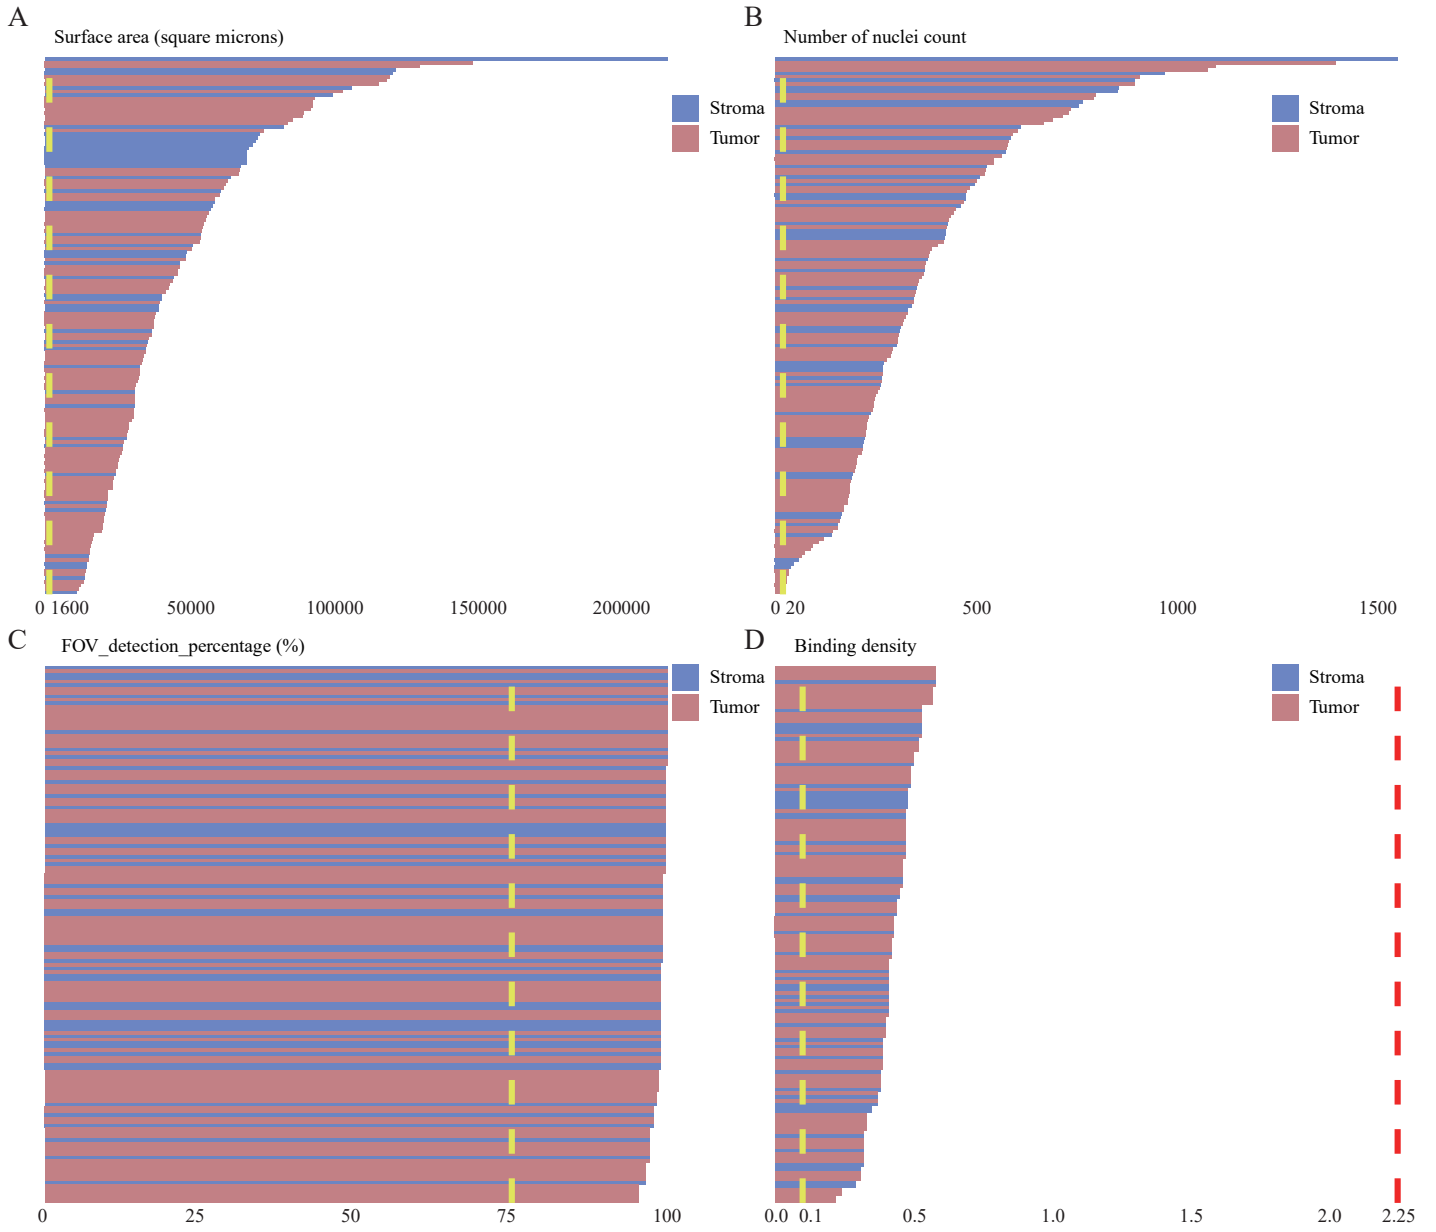

Supplement: jitc-2022-006234supp004_data_supplement.pdf [file jitc-2022-006234supp004_data_supplement.pdf]

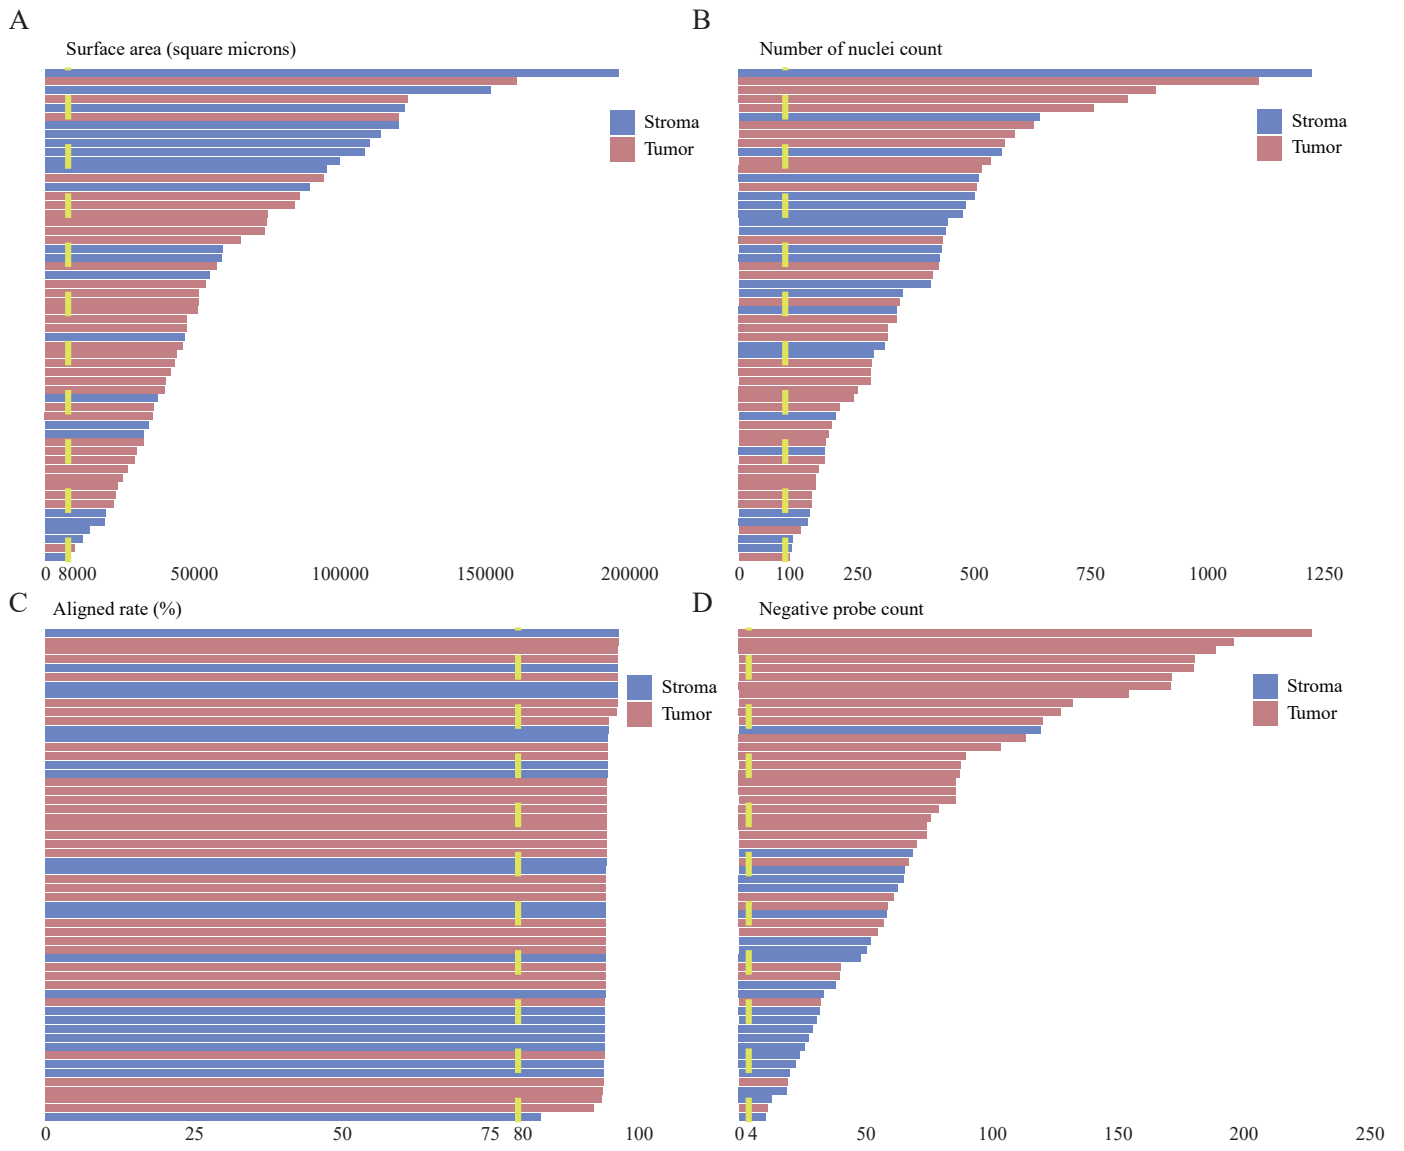

Supplement: jitc-2022-006234supp005_data_supplement.pdf [file jitc-2022-006234supp005_data_supplement.pdf]

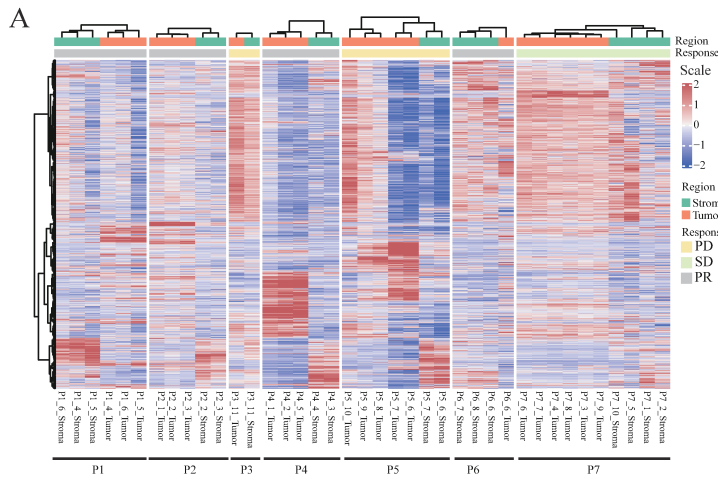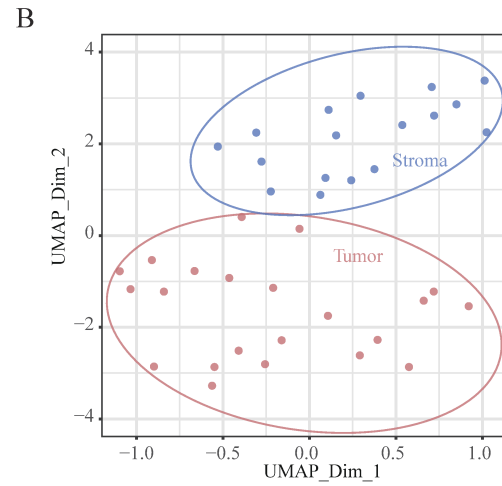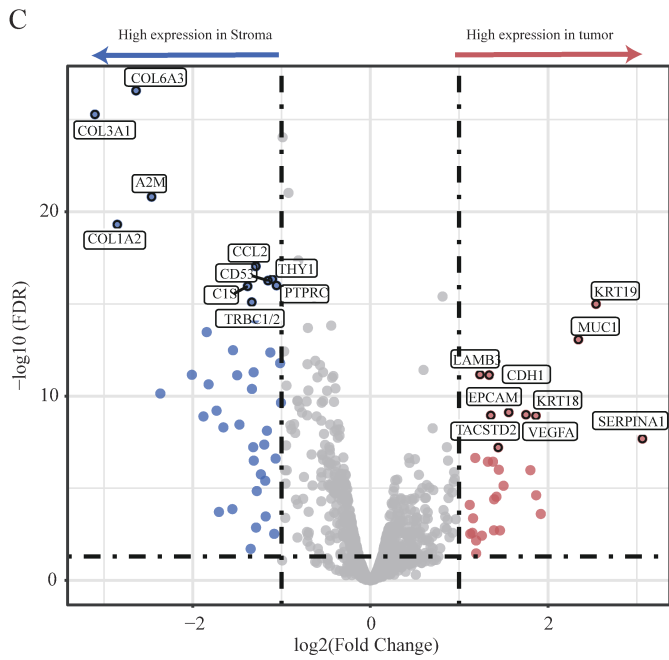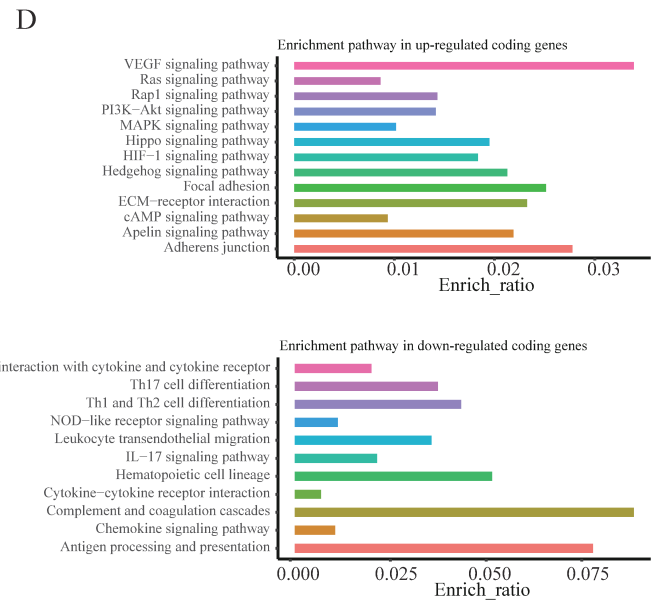

Supplement: jitc-2022-006234supp006_data_supplement.pdf [file jitc-2022-006234supp006_data_supplement.pdf]

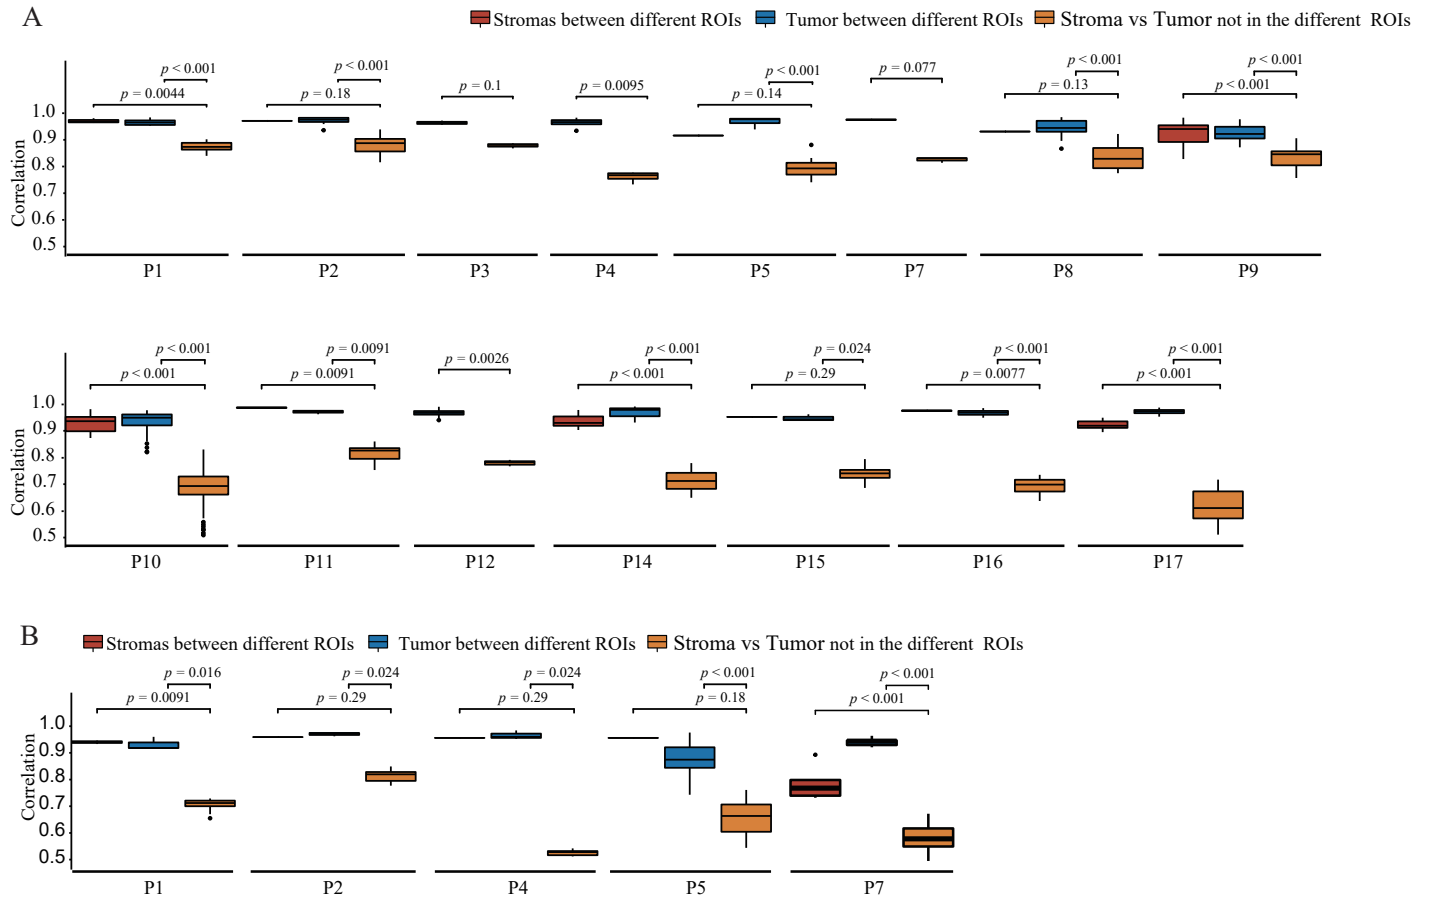

Supplement: jitc-2022-006234supp010_data_supplement.pdf [file jitc-2022-006234supp010_data_supplement.pdf]
